# Supplementary material for: Serum MicroRNAs Reflect Injury Severity in a Large Animal Model of Thoracic Spinal Cord Injury
Source: PubMed Central journal article supplement (PMC5431108; doi:10.1038/s41598-017-01299-x), 2017-05-03

## Supplementary Figures and Tables

### Serum MicroRNA Reflects Injury Severity in a Large Animal Model of Thoracic Spinal Cord Injury

Seth Tigchelaar<sup>1</sup>, Femke Streijger<sup>1</sup>, Sunita Sinha<sup>2</sup>, Stephane Flibotte<sup>2</sup>, Neda Manouchehri<sup>1</sup>, Kitty So<sup>1</sup>, Katelyn Shortt<sup>1</sup>, Elena Okon<sup>1</sup>, Michael Rizzuto<sup>1</sup>, Ivana Malenica<sup>3</sup>, Amanda Courtright<sup>3</sup>, Andrew Eisen<sup>4</sup>, Kendall Van Keuren-Jensen<sup>3</sup>, Corey Nislow<sup>2</sup>, Brian K. Kwon<sup>1,5,\*</sup>

<sup>1</sup>International Collaboration on Repair Discoveries (ICORD), University of British Columbia, Vancouver, British Columbia, Canada;

<sup>2</sup>Faculty of Pharmaceutical Sciences, University of British Columbia, Vancouver, British Columbia, Canada;

<sup>3</sup>Translational Genomics, Phoenix, Arizona, United States of America;

<sup>4</sup>Acorda Therapeutics, Ardsley, New York, United States of America;

<sup>5</sup> Vancouver Spine Surgery Institute, Department of Orthopedics, University of British Columbia, Vancouver, British Columbia, Canada

**\* Corresponding Author (and for Reprints):**

**Brian K. Kwon**, MD, PhD, FRCSC

*Canada Research Chair in Spinal Cord Injury*

Professor, Department of Orthopaedics, University of British Columbia

6th Floor, Blusson Spinal Cord Centre, Vancouver General Hospital

818 West 10th Avenue, Vancouver, BC, CANADA, V5Z 1M9

PH: 604-875-5857

FX: 604-875-8223

E-mail: brian.kwon@ubc.ca

|                 |                            |                                     |
|-----------------|----------------------------|-------------------------------------|
| Seth Tigchelaar | s.tigchelaar@alumni.ubc.ca | Ph: 604-675-8837, Fax: 604-675-8849 |
|-----------------|----------------------------|-------------------------------------|

|                              |                               |                                     |
|------------------------------|-------------------------------|-------------------------------------|
| Femke Streijger              | streijger@icord.org           | Ph: 604-675-8837, Fax: 604-675-8849 |
| Sunita Sinha                 | Sunita.sinha@ubc.ca           | Ph: 604-827-0310, Fax: 604-675-8849 |
| Stephane Flibotte            | sflibotte@gmail.com           | Ph: 604-827-0310, Fax: 604-675-8849 |
| Neda Manouchehri             | nedamanouchehri@gmail.com     | Ph: 604-675-8837, Fax: 604-675-8849 |
| Kitty So                     | Kitty.ubc@gmail.com           | Ph: 604-675-8837, Fax: 604-675-8849 |
| Katelyn Shortt               | Katelyn.shortt@gmail.com      | Ph: 604-675-8837, Fax: 604-675-8849 |
| Elena Okon                   | okon@icord.org                | Ph: 604-675-8837, Fax: 604-675-8849 |
| Michael Rizzuto              | Michael.rizzuto@alumni.ubc.ca | Ph: 604-675-8837, Fax: 604-675-8849 |
| Ivana Malenica               | imalenica@tgen.org            | Ph: 602-343-8400, Fax: 602-343-8411 |
| Amanda Courtright            | acourtright@tgen.org          | Ph: 602-343-8400, Fax: 602-343-8411 |
| Andrew Eisen                 | aeisen@acorda.com             | Ph: 914-326-5058, Fax: 914-606-9634 |
| Kendall<br>Van Keuren-Jensen | kjensen@tgen.org              | Ph: 602-343-8400, Fax: 602-343-8411 |
| Corey Nislow                 | corey.nislow@ubc.ca           | Ph: 604-827-0310, Fax: 604-675-8849 |
| *Brian K. Kwon               | brian.kwon@ubc.ca             | Ph: 604-875-5857, Fax: 604-875-8223 |

**Supplementary Table 1. Novel miRNA.** To be listed, the potential miRNA must be present in at least 30% of either Serum or CSF samples, and have more than 5 counts on average across all samples. Column one through three contains the location of the sequence predicted by miRDeep2 for the potential mature miRNA. Column four is the percentage of serum samples in which the miRNA was detected and column five is the percentage of CSF samples in which the miRNA was detected. Column six represents the total percentage of samples in which the miRNA was detected.

| miRNA Location |           |           | Mature Sequence                                                                         | % of serum Samples | % of CSF Samples | % of Total Samples |
|----------------|-----------|-----------|-----------------------------------------------------------------------------------------|--------------------|------------------|--------------------|
| Chr            | Start     | Stop      |                                                                                         |                    |                  |                    |
| chr15          | 133957559 | 133957616 | gcgacgagccccucgcacaaaccggaccugagcguuuugucguucggcucgcguga                                | 76.53              | 50.00            | 71.31              |
| chr6           | 870006    | 870063    | cgguccgggucggggcggggcgagcuuccucagugcggccggcgggucgcgccc                                  | 75.51              | 50.00            | 70.49              |
| chrX           | 39824716  | 39824776  | gccaguuacuuccgcucugaugggaucuaauuuccauuuacgagcggcgagcucugaac                             | 71.43              | 45.83            | 66.39              |
| chr12          | 37079098  | 37079158  | gcuucgacuuuuugcacuacugacuauuacagcugagcagugcaauaguuuuuagaaagc                            | 71.43              | 41.67            | 65.57              |
| chr5           | 66193719  | 66193780  | ucuccagcacaguguggauggucuaauagugaagcuccuaaacacugucuguaaagaug                             | 67.35              | 50.00            | 63.93              |
| chr13          | 24885255  | 24885316  | uucaaguaaccaggauaggcugcagggucccaaggggccuaauucuuugguuacuugcacg                           | 68.37              | 41.67            | 63.11              |
| chr10          | 6017465   | 6017551   | guccgagguagugguuauacagaacuuauuaacguuagucucuaaaguuugguauacaaccccc<br>ccacugcuaaaauugacug | 64.29              | 50.00            | 61.48              |
| chrX           | 48640827  | 48640885  | uaccuauugcauuacggaguuuguaauucucuaaagcaccuccuaugugcaugguuuac                             | 57.14              | 33.33            | 52.46              |
| chr16          | 51742262  | 51742327  | gcagagucaagccuguuagcacuuggaugggagaccgucugggcauaccgggucgugaggcuu                         | 55.10              | 25.00            | 49.18              |
| chr7           | 55687381  | 55687443  | ucugguucugugaccucgcuauuuugccuucagccagguuaagagcaucugaaccagggggu                          | 46.94              | 16.67            | 40.98              |
| chr5           | 30185306  | 30185368  | gugccugguucccucccagagguucaaaauuaauugcucugagauugaccuaggcaucc                             | 38.78              | 37.50            | 38.52              |
| chr3           | 42401527  | 42401607  | cugaugggcggggcaacgugagggcagccagcaccugugagguuugguugcugacguuggcucu<br>ggagggucggcu        | 39.80              | 25.00            | 36.89              |
| chr7           | 69920245  | 69920312  | cgcgccggggggcgccggaggguccacugagcucucccccacccucccgccucucucgccc                           | 37.76              | 25.00            | 35.25              |
| chr10          | 50066936  | 50066995  | ggcgggcccacggggccccccgugagcccggcccgccggccccguggccccccgg                                 | 30.61              | 37.50            | 31.97              |
| chr12          | 35722001  | 35722067  | cccuugaugaucuuuccucucucugguugagagagggcagagggagagaacaccgucugaguggu                       | 27.55              | 33.33            | 28.69              |

**Supplementary Figure 1.** Spearman Correlation (green) of subsets of randomly selected reads to a total of 1.7 million reads, starting with 1,000 reads and incrementally increasing by thousands to 300,000. Number of miRNA detected (blue) using randomly selected reads, starting with 1,000 reads and incrementally increasing by thousands to 300,000.

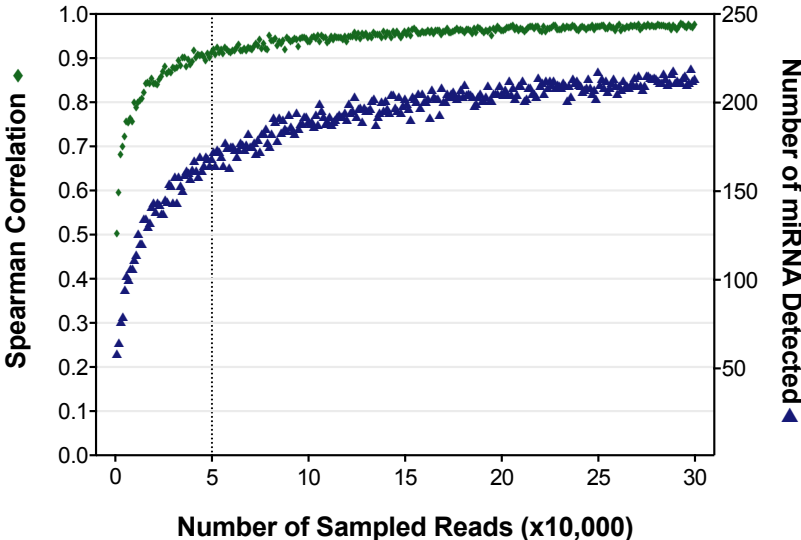

Supplemental Figure 2. Correlation of serum and CSF miRNA counts for all detected genes.

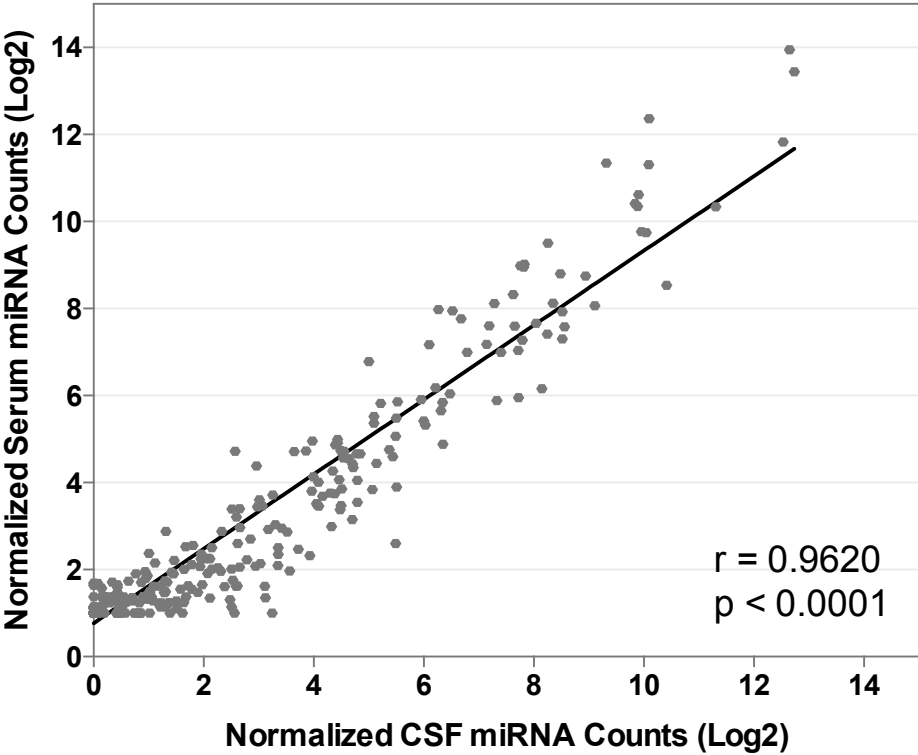

**Supplementary Figure 3. Effect of Injury Severity on Global miRNA Expression.** Raw data showing the global miRNA expression at BSL, 1, 3, and 5 dpi in each of the A. 40 cm, B. 20 cm, C. 10 cm, and D. SHAM groups. Datapoints represent the average read counts for the top 100 miRNA genes for n=4 animals per group and time point (see Table 1).

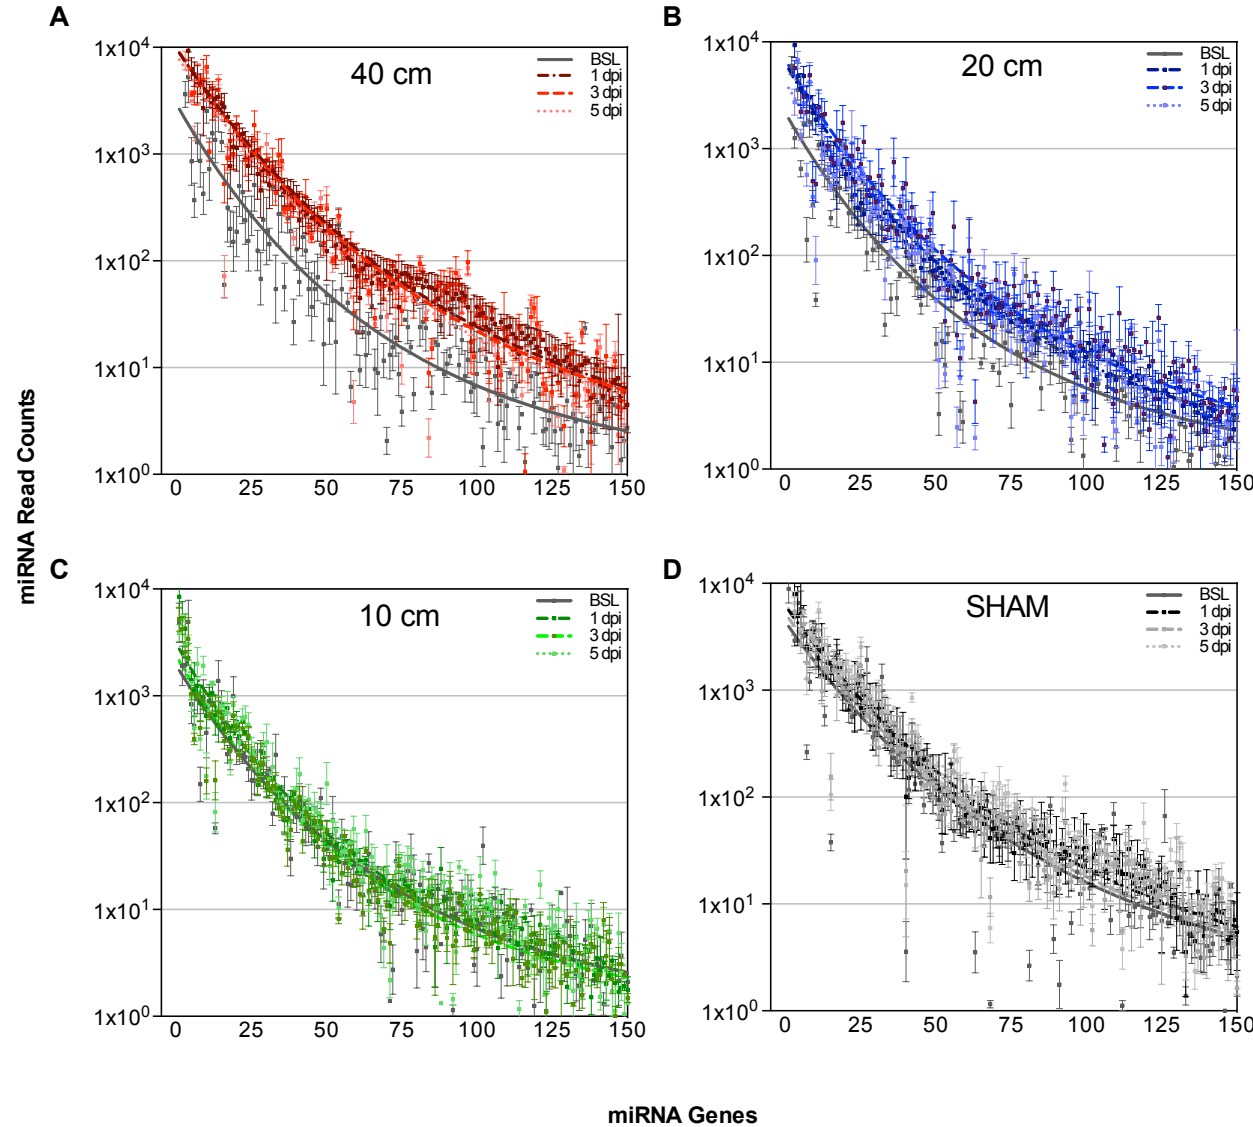



|             |          |          |         |          |         |          |          |          |
|-------------|----------|----------|---------|----------|---------|----------|----------|----------|
| miR-144     |          |          | 2.93 *  |          |         |          |          |          |
| miR-145-3p  | 1.82 *   |          |         |          |         |          |          |          |
| miR-145-5p  | 1.89 **  |          |         |          |         |          |          |          |
| miR-1468    |          |          |         |          | 1.31 ** |          |          | 1.39 *** |
| miR-148b-3p |          | 3.24 *   | 3.20 *  |          |         |          |          |          |
| miR-149     | 1.41 **  | 1.41 **  | 1.34 ** |          |         |          |          |          |
| miR-150     |          | 1.47 **  | 1.49 *  |          |         |          |          |          |
| miR-152     |          | 1.63 **  | 1.51 *  |          |         |          |          |          |
| miR-15a     | 2.10 *   | 1.96 *   | 2.01 ** |          |         |          |          |          |
| miR-204     | 6.38 **  |          |         |          |         |          |          |          |
| miR-208b    | 5.85 *** | 3.33 *** |         | 5.50 *** |         | 4.85 **  | 7.43 **  |          |
| miR-216     | 3.67 *** |          |         |          |         |          |          |          |
| miR-22-3p   | 1.18 *   | 1.16 *   |         | 1.21 **  |         |          |          |          |
| miR-22-5p   | 3.26 **  | 3.20 **  | 2.57 ** |          |         |          |          |          |
| miR-221-3p  |          | 1.43 *** | 1.42 ** |          |         |          |          |          |
| miR-222     |          | 1.67 **  | 1.73 ** |          |         |          |          |          |
| miR-23b     |          | 3.27 *   | 3.10 ** |          |         |          |          |          |
| miR-26a     |          | 1.55 *   | 1.53 *  |          |         |          |          |          |
| miR-27a     | 1.50 *   | 1.41 *   |         |          |         |          |          |          |
| miR-27b-3p  | 1.29 *   |          |         | 1.20 **  | 1.11 ** |          |          |          |
| miR-29c     | 4.24 *   |          |         |          |         |          |          |          |
| miR-301     |          | 2.33 **  | 2.30 ** |          |         |          |          |          |
| miR-30a-3p  |          |          |         |          | 1.33 ** |          |          |          |
| miR-30a-5p  |          |          |         | 1.18 *   | 1.17 ** |          |          |          |
| miR-30b-5p  |          | 1.60 *   |         |          |         |          |          |          |
| miR-365-3p  | 2.78 *   |          |         | 1.59 *   | 1.57 *  | 1.48 *** |          |          |
| miR-378     | 1.46 **  | 1.39 **  | 1.24 *  | 1.51 *** | 1.40 ** | 1.32 **  | 1.37 *** |          |
| miR-378b-3p | 2.26 **  | 2.43 *** | 1.96 ** | 2.43 **  | 2.38 ** |          |          | 2.26 **  |
| miR-423-3p  |          | 1.12 *   |         |          |         |          |          |          |
| miR-425-3p  |          | 2.08 *   |         |          |         |          |          |          |
| miR-425-5p  |          | 1.31 *   | 1.28 ** |          |         |          |          |          |
| miR-4331    | 0.79 **  | 0.78 *   | 0.63 ** |          |         |          |          |          |
| miR-450b-5p | 2.30 *** |          |         |          |         |          |          |          |



|              |           |           |           |           |           |          |          |          |
|--------------|-----------|-----------|-----------|-----------|-----------|----------|----------|----------|
| miR-451      |           | 1.36 *    | 1.32 *    |           |           |          |          |          |
| miR-486      |           | 1.17 *    |           |           | 1.19 **   |          |          |          |
| miR-574      | 1.51 **   | 1.48 ***  | 1.46 **   |           |           |          |          |          |
| miR-7134-3p  |           | 1.56 *    | 1.57 **   |           |           |          |          |          |
| miR-7139-5p  |           |           | 1.65 **   |           | 1.64 *    |          |          |          |
| miR-744      |           |           | 1.35 *    |           |           |          |          |          |
| miR-885-5p   | 8.09 **   | 6.50 *    |           |           |           |          |          |          |
| miR-98       |           | 1.86 *    | 1.81 *    |           |           |          |          |          |
| miR-9841-3p  |           | 1.78 **   | 1.73 **   |           |           |          |          |          |
| <b>Total</b> | <b>27</b> | <b>42</b> | <b>37</b> | <b>16</b> | <b>16</b> | <b>9</b> | <b>5</b> | <b>2</b> |

**Supplementary Figure 4. Correlations between total miRNA expression and Porcine Thoracic Injury Behaviour Scores.** Correlation between 12 wpi PTIBS scores and the total miRNA counts at **A.** Baseline before injury (BSL), **B.** 1 dpi, **C.** 3 dpi, and **D.** 5 dpi. The global upregulation in miRNA at 1 and 3 dpi is correlated strongly with the behavioral recovery at 12 weeks post-injury.

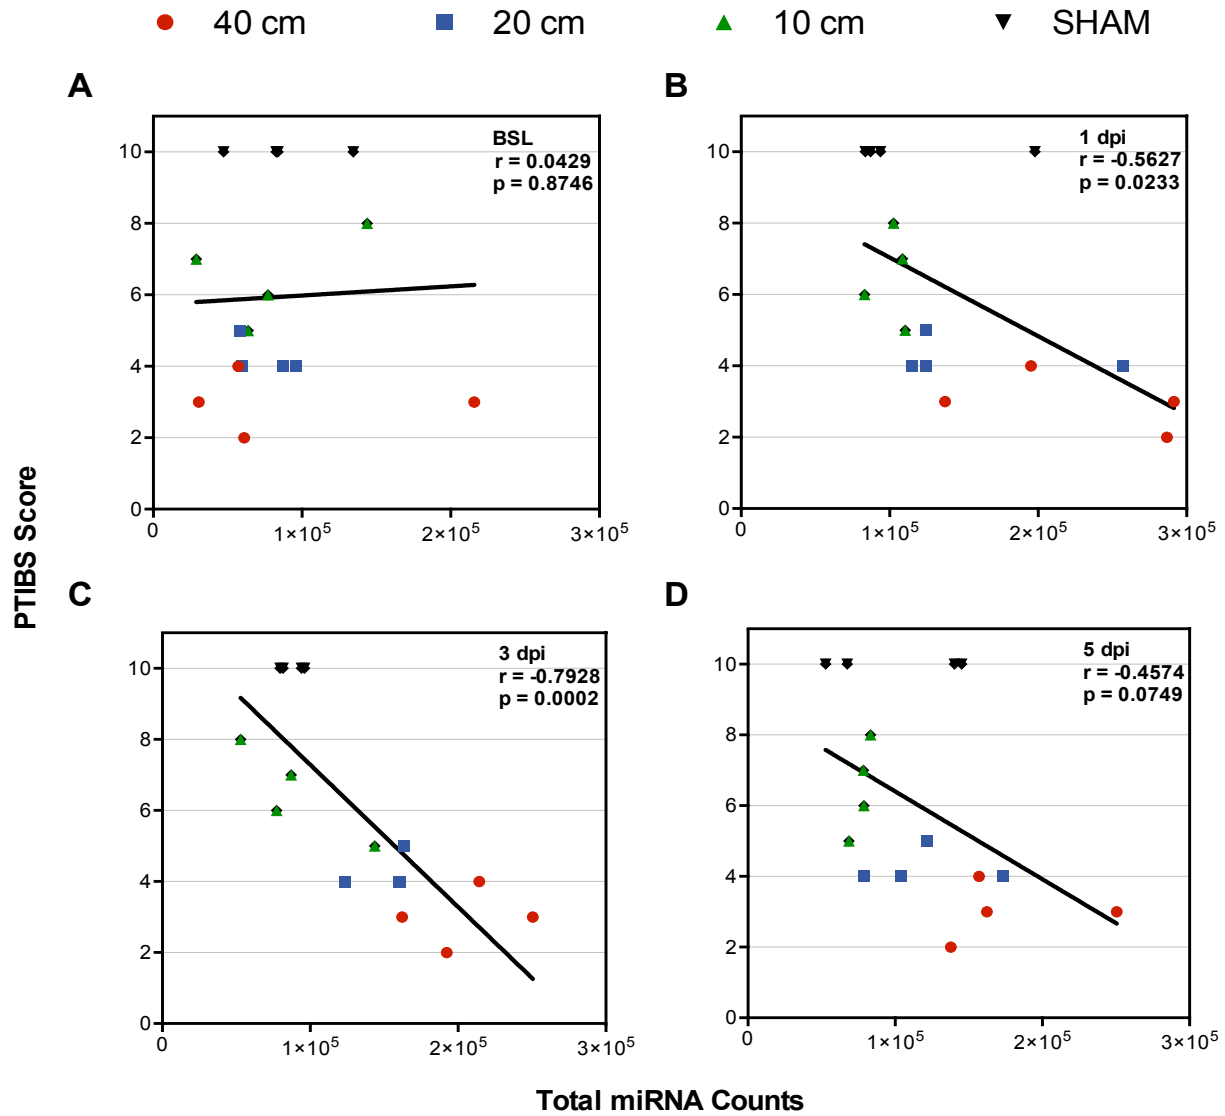

**Supplementary Figure 5. Correlations between total miRNA expression levels and total percent spared tissue.** Correlation between total percent spared tissue and the total miRNA counts at **A.** baseline before injury (BSL), **B.** 1 day post-injury (dpi), **C.** 3 dpi, and **D.** 5 dpi. The global upregulation in miRNA is correlated strongly with the extent of tissue damage at 1 and 3 dpi in particular.

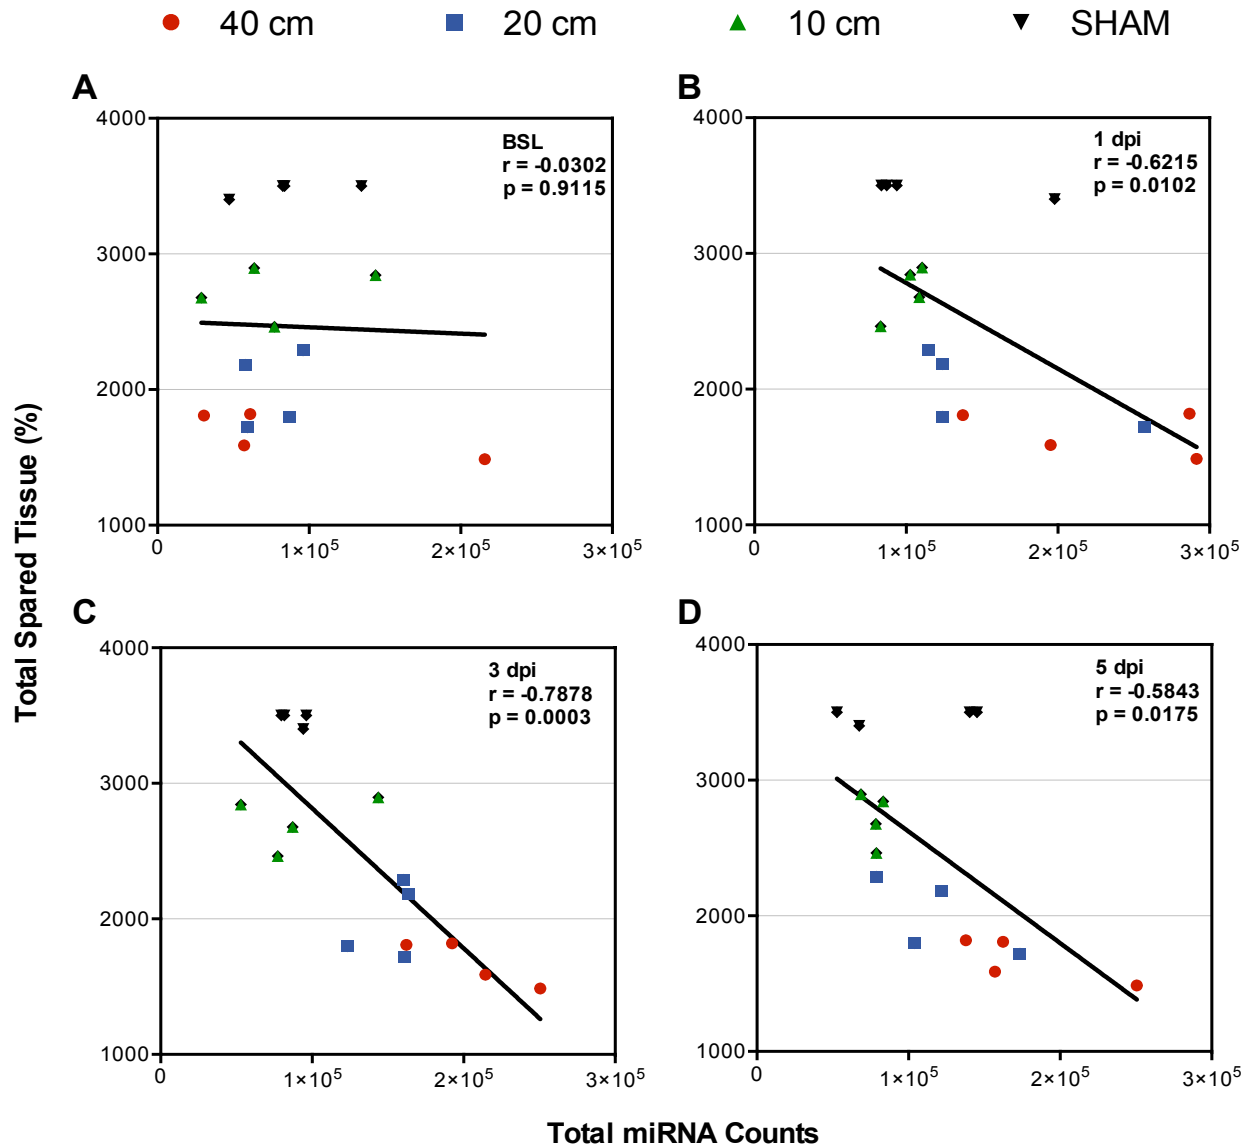

**Supplementary Figure 6. Correlation between Force of Injury (N) and outcome parameters.** Correlation between Force of injury and **A.** Porcine Thoracic Injury Behaviour Scores at 12 wpi and **B.** Total percent spared tissue. These figures simply demonstrate that for our pig model of thoracic SCI, the initial force of the contusion impact (dictated by the height of the weight drop) is strongly correlated to the degree of hindlimb locomotor impairment as measured by PTIBS (**A**) and the amount of tissue damage that occurs in the spinal cord (**B**).

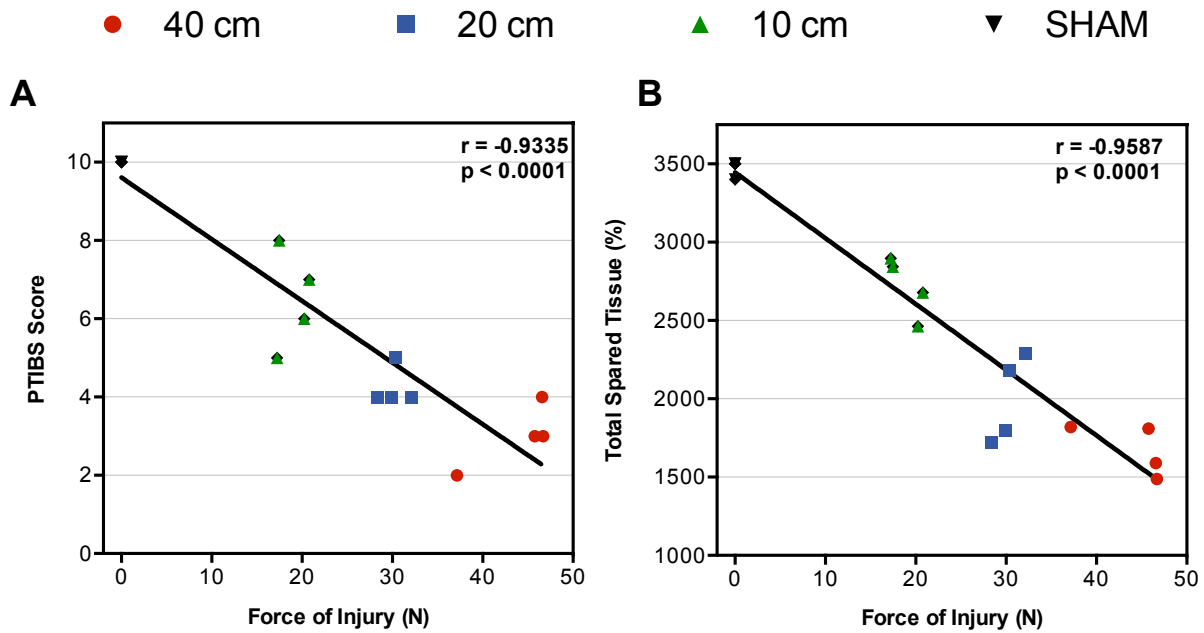

Supplement: 41598_2017_1299_MOESM1_ESM.pdf [file 41598_2017_1299_MOESM1_ESM.pdf]
